# Supplementary material for: An absolute requirement for Pax7-positive satellite cells in acute injury-induced skeletal muscle regeneration
Source: Oxford University Press journal article supplement (doi:10.1242/dev.067595), 2011-08-09
Supplement: dev067595tables1.pdf [file dev067595tables1.pdf]

**Table S1. Genotyping and RT-PCR primers**

| Gene                             | Primer 1 (5'-3')       | Primer 2 (5'-3')        | Size (bp) |
|----------------------------------|------------------------|-------------------------|-----------|
| <b>Genotyping</b>                |                        |                         |           |
| <i>Pax7</i>                      | ACTAGGCTCCACTCTGTCCTTC | GCAGATGTAGGGACATTCCAGTG | 724       |
| <i>Pax7<sup>CE</sup></i>         | ACTAGGCTCCACTCTGTCCTTC | GCAGATGTAGGGACATTCCAGTG | 231       |
| <i>Rosa26<sup>+</sup></i>        | AAAGTCGCTCTGAGTTGTTAT  | GGAGCGGGAGAAATGGATATG   | 650       |
| <i>Rosa26<sup>lacZ</sup></i>     | AAAGTCGCTCTGAGTTGTTAT  | GCGAAGAGTTTGTCTCAACC    | 340       |
| <i>Rosa26<sup>eGFP-DTA</sup></i> | AAAGTCGCTCTGAGTTGTTAT  | CCTCGAACTTCACCTCGGC     | ~750      |
| <b>RT-PCR</b>                    |                        |                         |           |
| <i>Pax7</i>                      | CAAGAGGTTTATCCAGCCGAC  | GAGGGCACCGTGCTTCGGTC    | 498       |
| <i>Cre</i>                       | TTGGAGGCCTAGGCTTTTGCA  | GCGTTCGAACGCTAGAGCCTG   | 532       |
| <i>Gapdh</i>                     | GCTCATGACCACAGTCCATGC  | GGATGCAGGATGATGTTCTGG   | 111       |
