# Supplementary figures and images for: An absolute requirement for Pax7-positive satellite cells in acute injury-induced skeletal muscle regeneration
Source: Oxford University Press journal article supplement (doi:10.1242/dev.067595), 2011-08-09

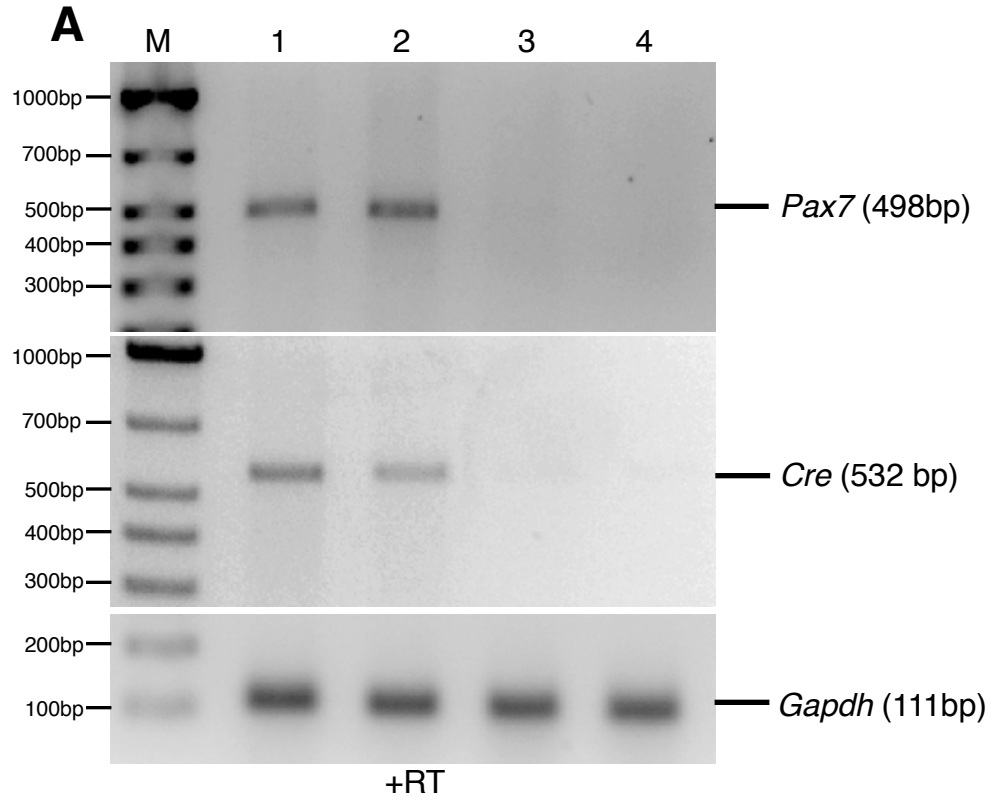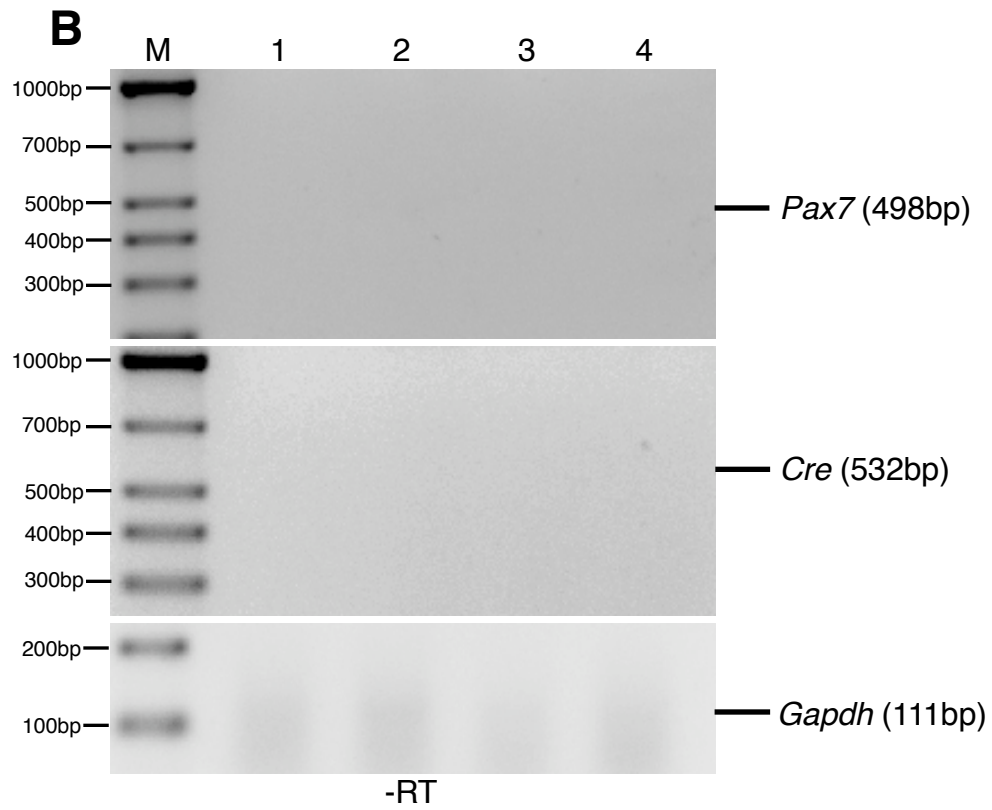

Supplement: dev067595figs1.pdf [file dev067595figs1.pdf]

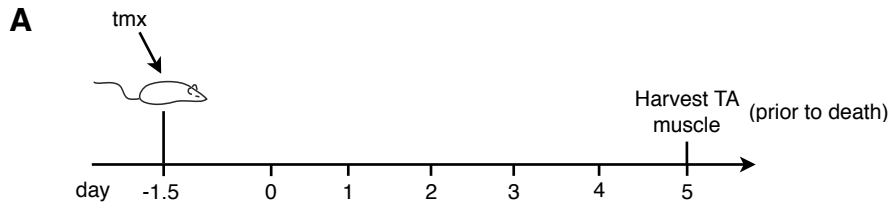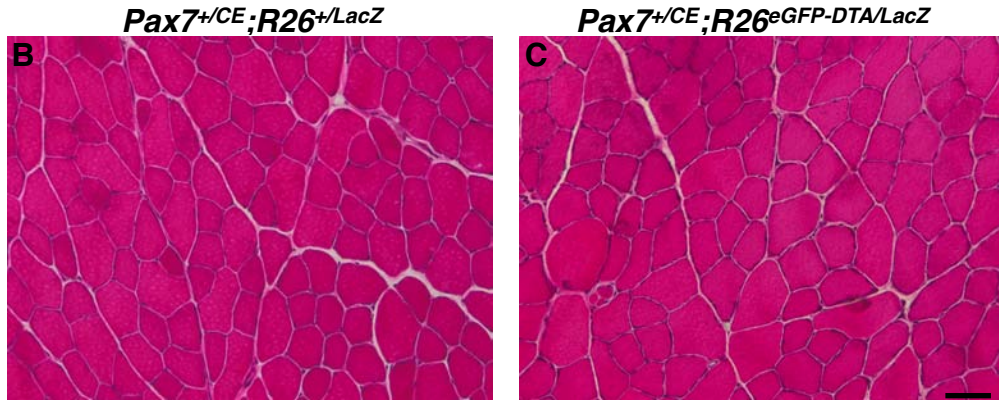

Hematoxylin Eosin

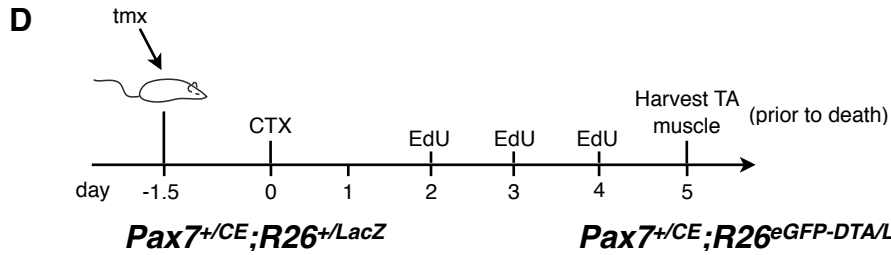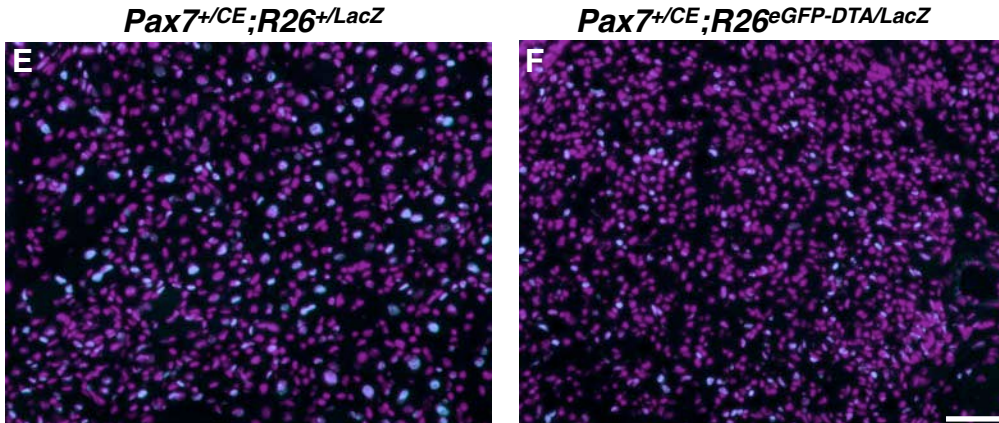

EdU DAPI

Supplement: dev067595figs2.pdf [file dev067595figs2.pdf]

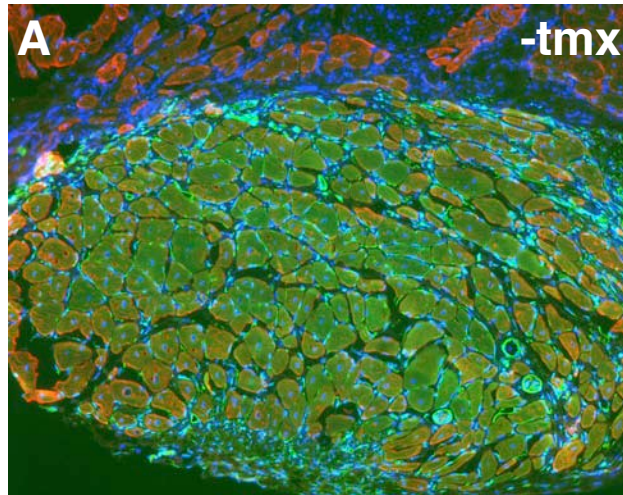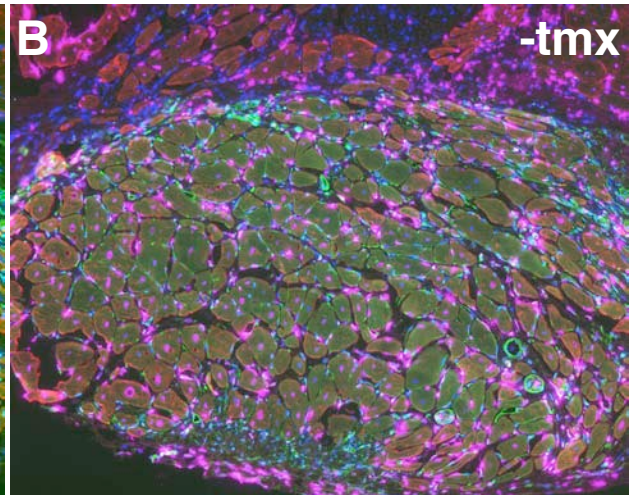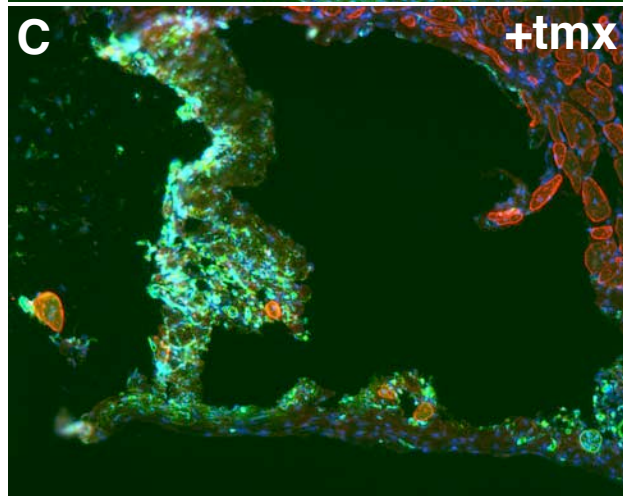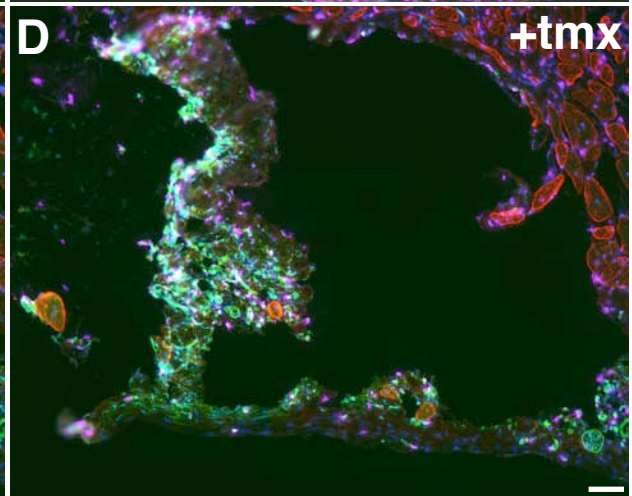

**MF-20** **GFP** **DAPI**

**MF-20** **GFP** **DAPI** **BrdU**

Supplement: dev067595figs3.pdf [file dev067595figs3.pdf]
